# Supplementary material for: Risk Stratification for Imminent Risk of Death at the Time of Palliative Radiotherapy Consultation
Source: PubMed Central journal article supplement (PMC8251501; doi:10.1001/jamanetworkopen.2021.15641), 2021-07-01
Supplement: jamanetwopen-e2115641-s001.pdf [file jamanetwopen-e2115641-s001.pdf]

## Supplemental Online Content

Wu SY, Yee E, Vasudevan HN, et al. Risk stratification for imminent risk of death at the time of palliative radiotherapy consultation. *JAMA Netw Open*. 2021;4(7):e2115641. doi:10.1001/jamanetworkopen.2021.15641

**eTable.** Patient Characteristics

**eAppendix.** Source Code

This supplemental material has been provided by the authors to give readers additional information about their work.

eTable. Patient characteristics

| <b>Variable</b>                                    | <b>Median (IQR) or %<br/>(n, of 518)</b> |
|----------------------------------------------------|------------------------------------------|
| Age at diagnosis                                   | 60 (50-68)                               |
| Age at palliative radiotherapy (RT)                | 63 (54-71)                               |
| Gender                                             |                                          |
| Female                                             | 46% (238)                                |
| Male                                               | 54% (280)                                |
| Race                                               |                                          |
| White                                              | 66% (340)                                |
| East Asian                                         | 14% (74)                                 |
| African American                                   | 8.7% (45)                                |
| South Asian                                        | 7.3% (38)                                |
| Other (includes American Indian, Pacific Islander) | 4.1% (21)                                |
| Percent Hispanic                                   | 9.1% (47)                                |
| Primary diagnosis                                  |                                          |
| Lung                                               | 26% (137)                                |
| Breast                                             | 19% (97)                                 |
| Prostate                                           | 9.7% (50)                                |
| Renal cell                                         | 5.8% (30)                                |
| Colorectal                                         | 5.8% (30)                                |
| Hepatocellular                                     | 3.8% (20)                                |
| Head and Neck                                      | 3.5% (18)                                |
| Skin                                               | 3.3% (17)                                |
| Other*                                             | 23% (119)                                |
| Metastatic at diagnosis                            | 49% (254)                                |
| Site of metastases                                 |                                          |
| Brain                                              | 47% (244)                                |
| Lung                                               | 55% (284)                                |
| Liver                                              | 40% (208)                                |
| Bone only                                          | 17% (90)                                 |
| Body mass index last course                        | 24 (21-27)                               |
| KPS last consult                                   | 60 (50-80)                               |
| KPS >70                                            | 45% (231/511)                            |
| Hospitalization within 3 months of RT consult      | 58% (289/500)                            |
| Survival time since diagnosis (months)             | 28 (11-53)                               |
| Survival time following RT (months)                | 2.2 (0.9-5.5)                            |
|                                                    |                                          |

| TEACHH score <sup>2</sup>             | % (N*)        | Median survival in our cohort, (95% CI) | Published median survival, (95% CI, if available) |
|---------------------------------------|---------------|-----------------------------------------|---------------------------------------------------|
| 0-1 (Group A)                         | 6.2% (32/450) | 6.0 mo (3.2-8.2)                        | 20 mo (14-31)                                     |
| 2-4 (Group B)                         | 68% (352/450) | 2.0 mo (1.7-2.3)                        | 5.0 mo (4.3-5.6)                                  |
| 5-6 (Group C)                         | 13% (66/450)  | 1.3 mo (0.7-1.7)                        | 1.7 mo (1.2-2.1)                                  |
| <b>Chow group<sup>3</sup></b>         |               |                                         |                                                   |
| I                                     | 18% (92/510)  | 4.7 wks (2-11)                          | 60 wks (37-70)†                                   |
| II                                    | 44% (227/510) | 2.5 wks (1.0-5.6)                       | 26 wks (20-31)†                                   |
| III                                   | 37% (191/510) | 1.6 wks (0.7-2.7)                       | 9.0 wks (6-11) †                                  |
| <b>NEAT group (score)<sup>4</sup></b> |               |                                         |                                                   |
| Very low risk (0-1)                   | 19% (57/297)  | 5.4 mo                                  | 25 mo                                             |
| Low risk (2)                          | 29% (85/297)  | 3.3 mo                                  | 15 mo                                             |
| Intermediate risk (2.5-3.5)           | 38% (114/297) | 2.0 mo                                  | 4.0 mo                                            |
| High risk (4-5)                       | 14% (41/297)  | 1.4 mo                                  | 1.2mo                                             |

Abbreviations: RT: radiotherapy; KPS: Karnofsky performance status

\*Denominator reflects limited data, scores only calculated if all variables available

†Training set, with similar numbers for the temporal and external validation sets

## eAppendix. Source Code

```
#univariate models for survival  
require(survival)
```

```
agecox <- coxph(Surv(StartToDeath, rep(1, nrow(Data10092019)))~ AgeTx, data =  
Data10092019)  
summary(agecox)  
cox.zph(agecox)#test proportional hazards assumption
```

```
agedxcox <- coxph(Surv(StartToDeath, rep(1, nrow(Data10092019)))~ AgeDx, data =  
Data10092019)  
summary(agedxcox)  
cox.zph(agedxcox)#test proportional hazards assumption
```

```
racecox <- coxph(Surv(StartToDeath, rep(1, nrow(Data10092019)))~ RaceCod, data =  
Data10092019)  
summary(racecox)  
cox.zph(racecox)#test proportional hazards assumption
```

```
txsitecox <- coxph(Surv(StartToDeath, rep(1, nrow(Data10092019)))~ TxSiteGen, data =  
Data10092019)  
summary(txsitecox)  
cox.zph(txsitecox)#test proportional hazards assumption
```

```
codedsitecox <- coxph(Surv(StartToDeath, rep(1, nrow(Data10092019)))~ CodedBreastProstate,  
data = Data10092019)  
summary(codedsitecox)  
cox.zph(codedsitecox)#test proportional hazards assumption
```

```
numpallchemocox <- coxph(Surv(StartToDeath, rep(1, nrow(Data10092019)))~  
NumberPalliativeChemo, data = Data10092019)  
summary(numpallchemocox)  
cox.zph(numpallchemocox)#test proportional hazards assumption
```

```
bmicox <- coxph(Surv(StartToDeath, rep(1, nrow(Data10092019)))~ BMI, data = Data10092019)  
summary(bmicox)  
cox.zph(bmicox)#test proportional hazards assumption
```

```
hosp3cox <- coxph(Surv(StartToDeath, rep(1, nrow(Data10092019)))~ Hosp3moconsult, data =  
Data10092019)  
summary(hosp3cox)  
cox.zph(hosp3cox)#test proportional hazards assumption
```

```
hepcocx <- coxph(Surv(StartToDeath, rep(1, nrow(Data10092019)))~ HepaticMet, data =  
Data10092019)  
summary(hepcocx)  
cox.zph(hepcocx)#test proportional hazards assumption
```

```
ecogcox <- coxph(Surv(StartToDeath, rep(1, nrow(Data10092019)))~ ECOGscore, data =  
Data10092019)  
summary(ecogcox)  
cox.zph(ecogcox)#test proportional hazards assumption
```

```
metdxcox <- coxph(Surv(StartToDeath, rep(1, nrow(Data10092019)))~ MetDx, data =  
Data10092019)  
summary(metdxcox)  
cox.zph(metdxcox)#test proportional hazards assumption
```

```
braincox <- coxph(Surv(StartToDeath, rep(1, nrow(Data10092019)))~ BrainMet, data =  
Data10092019)  
summary(braincox)  
cox.zph(braincox)#test proportional hazards assumption
```

```
lungcox <- coxph(Surv(StartToDeath, rep(1, nrow(Data10092019)))~ LungMet, data =  
Data10092019)  
summary(lungcox)  
cox.zph(lungcox)#test proportional hazards assumption
```

```
numbmetcox <- coxph(Surv(StartToDeath, rep(1, nrow(Data10092019)))~ NumMets, data =  
Data10092019)  
summary(numbmetcox)  
cox.zph(numbmetcox)#test proportional hazards assumption
```

```
albcox <- coxph(Surv(StartToDeath, rep(1, nrow(Data10092019)))~ Albuming, data =  
Data10092019)  
summary(albcox)  
cox.zph(albcox)#test proportional hazards assumption
```

```
#multivariate model based on univariate and clinical judgment
```

```
mvcox <- coxph(Surv(StartToDeath, rep(1, nrow(Data10092019)))~ Albuming + NumMets +  
LungMet +  
BrainMet + ECOGscore + HepaticMet + Hosp3moconsult + BMI + NumberPalliativeChemo  
+  
CodedBreastProstate + AgeTx, data = Data10092019)
```

```
summary(mvcox)
```

```

RPA for death
#RPA.r
#imports Data10092019met database and reformats variables appropriately
#computes RPA and prints out outcomes data

#appropriately format variables
Data10092019$SexCod <- as.factor(Data10092019$SexCod)
Data10092019$RaceCod <- as.factor(Data10092019$RaceCod)
Data10092019$TxSiteGen <- as.factor(Data10092019$TxSiteGen)
Data10092019$TxSiteSpec <- as.factor(Data10092019$TxSiteSpec)
Data10092019$CodedBreastProstate <- as.factor(Data10092019$CodedBreastProstate)
Data10092019$Hosp3moconsult <- as.factor(Data10092019$Hosp3moconsult)
Data10092019$HepaticMet <- as.factor(Data10092019$HepaticMet)
#Data10092019$ECOGscore <- as.numeric(Data10092019$ECOGscore)
Data10092019$OtherMets <- as.factor(Data10092019$OtherMets)
Data10092019$MetDx <- as.factor(Data10092019$MetDx)
Data10092019$BrainMet <- as.factor(Data10092019$BrainMet)
Data10092019$LungMet <- as.factor(Data10092019$LungMet)
Data10092019$InpatientCoded <- as.factor(Data10092019$InpatientCoded)
Data10092019$NumMets <- as.factor(Data10092019$NumMets)
Data10092019$PtBase <- as.factor(Data10092019$PtBase)
Data10092019$CodIncompleeFx <- as.factor(Data10092019$CodIncompleeFx)

#RPA w StartToDeath
library(rpart)
library(survival)
set.seed(220)
#include all variables to start
osrpa <- rpart(Surv(StartToDeath, rep(1, nrow(Data10092019))) ~ SexCod + RaceCod +
TxSiteGen +
          CodedBreastProstate + Hosp3moconsult + HepaticMet + ECOGscore + OtherMets +
          MetDx + BrainMet + LungMet + InpatientCoded + NumMets + PtBase + AgeTx +
NumberPalliativeChemo + BMI,
          data = Data10092019)
library(rpart.plot)
prp(osrpa) #print pre-parsed

#check to prune the tree
plotcp(osrpa) #print out plot to determine the appropriate complexity parameter
prunedos <- prune(osrpa, 0.014)
prp(prunedos)

```
